# Supplementary material for: PvTFDB: a Phaseolus vulgaris transcription factors database for expediting functional genomics in legumes
Source: PubMed Central journal article supplement (PMC4962766; doi:10.1093/database/baw114), 2016-07-27
Supplement: supp_baw114_Supplimentary_File1.pdf [file supp_baw114_Supplimentary_File1.pdf]

**TUTORIAL**

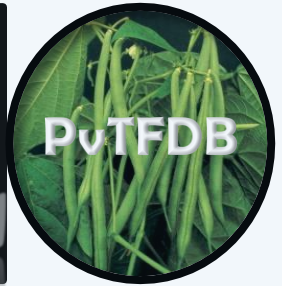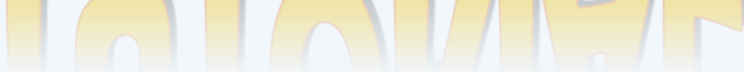

# NAVIGATION BAR

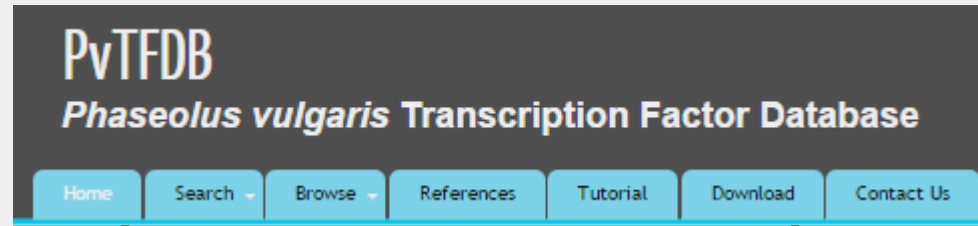

*Display homepage*

*Search by using either Gene ID or Gene function*

*Browse by using family name or chromosome number*

*Selected references for further reading*

*Download the data*

*Contact details*

# HOME PAGE

PvTFDB

*Phaseolus vulgaris* Transcription Factor Database

Home

Search

Browse

References

Tutorial

Download

Contact Us

## Welcome to PvTFDB

*Phaseolus vulgaris* is a herbaceous annual plant grown globally for its eatable dry seed called as beans or green beans for unripe fruit. Its leaf has vegetable properties whereas the straw is used as fodder. It is a member of the legume family Fabaceae, well known for its nitrogen-fixing bacteria properties. *Phaseolus vulgaris* is a highly variable climber species with a long history of cultivation. *Phaseolus vulgaris* is one of the most significant food legume in the biosphere. Although this crop is an essential crop to both the developed and developing world as a resources of dietary protein source. It delivers 15% of the protein and 30% of the caloric necessity to the world's population, and symbolises 50% of the grain legumes used worldwide.

The recently published Common bean's genome sequence data (Jeremy, S, et al. 2014) given us an opportunity to develop a comprehensive transcription factors (TF) database, called *Phaseolus vulgaris* Transcription Factors Database (PvTFDB) using various computational methods. PvTFDB is the first online comprehensive TF database developed for the legume crop *Phaseolus vulgaris* L. (Common Bean). This database contains a set of 2370 predicted TFs (Gene models) and classifies them into 49 TF families. In addition, this database provides comprehensive information at both family and gene level. At family level, this database provides description about the family, list of predicted TFs, phylogenetic tree for entire TF family and tissue specific RNA-Seq based gene expression in the form of heatmap for entire TF family. At gene level, this database provides physical location, sequences (Protein, CDS, Transcript, Genomic and 2kb Upstream sequences), functional annotation (by InterProScan), protein physical properties, mined SSRs along with their primers, mined Cis-elements from 2kb upstream sequences, orthologs in other legume crops along with their protein sequences and tissue specific RNA-Seq expression. This database also provides the researchers to download the entire data used to build the database freely.

The design of PvTFDB database schema follows the "Three-Level-Schema" architecture, is shown in [Figure 1](#) and developed using open-source softwares, MySQL, Apache and PHP. The PvTFDB schema diagram is shown in [Figure 2](#).

To use this database, please follow through the tutorial provided in "Tutorial" tab.

### If you use this database, please cite us:

Bhawna, VS Bonthala and Prasad G (2016). PvTFDB: A comprehensive *Phaseolus vulgaris*'s Transcription Factor Database

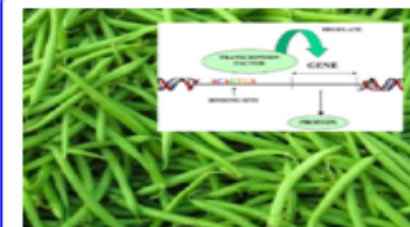

## Useful Links

- [Common bean's Genome Sequence Data](#)
- [Common bean's Genome Sequencing Article](#)
- [Common bean's Expression Atlas Database](#)
- [Common bean's Expression Atlas Database Article](#)

## Visitors Map

1dan, Jammu and Kashmir

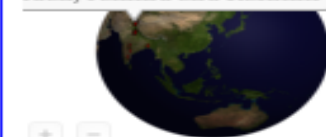

75 Visits  
REVOLVERMAPS

# SEARCH BY GENE ID

Home Search Browse References Tutorial Download Contact Us

by Gene ID

by Function

Browse by Gene ID

eg: Phvul.001G031200.1

Submit Reset

Summary Sequences Annotation Physical Properties SSRs Expression Cis-elements Orthologs Go Back

## Protein Sequence:

>Phvul.001G031200.1  
MKSMDNGNTDDGNNHMLGFSLSPHMKMEIASADPPHHHHHHYHPQVSAAPAAACNTVPTNFYTSHLNLSGICYGVGENSAFHPPAMMPLKSDGSLCIMEAFTRSQT  
IMEAFTRSQTQVMVPTTSPKLEDFLGGASMGADYGGHEREAMALSLSIYSSQNAEPEANRDHPSSLGLLSDPFRQQTHPYSSGLGIYQVEEAKQPNVTVCSQQMPQ  
VTVCSSQMPQVVEEGIACFKIMVPRGYSSSQNLEQQHQVNNMGENHSGASGNVAGVGCGLQSLSLSMSPGSQSSCVTPQTSSSGTESVVGDAKRGSAKLGQKQ  
RGSAKLGQKQPVHRKSIDTFGQRTSQYRGVTRHRWTGRYEHLWDNSCKKKEGQTRKGRQVYLGQYDMEEKAAARAYDLAALKYWGPTSHINFLPENYQTELEEMNMSRQE  
EEMKNMSRQEVVAHLRRKSSGFSRGASMYRGVTRHHQHGRWQARIGRVAGNKDLYLGTFTSQEEAAEYDVAAIKFRGVNAVTFNDFISRYDVERIMASNTLLAGELARRN  
LLAGELARRNKESEPRTEATEYMWSSQQAISSSREEAETVNNNDNNEKSSSDWKMGLYHQQQSSNNCDMKTKMKNYRGSFVSLSQDLIGDIDSVGSSQAMLEESTK  
SQAMLEESTKIGTHFSNPSSLVTSLSSSREGSPDKTGPTVLFKPPVGSKVVTSPANGVSVGSWFPSPQMRPVAMSHLPVFAAWSDT

## CDS Sequence:

>Phvul.001G031200.1  
ATGAAGTCCATGAATGATGGCAACACTGATGATGGGAACAATCATAACTGGTTGGGGTTCTCTCTCACCCACATGAAAATGGAAAATTGCTTCTTCTGCTGACCCCTC  
CTGACCCCTCCTCATCACCATCATCACTACTATCATCACCCTCAGGTTTCTGCTGCTGACGACCTTGAACACTGTTCCAACAACCTTCTATACCTCACACCTTAAC  
ACACCTTAACACCTCAGGAATCTGCTATGGTGTGGAGAAAACAGTGCCTTTACCCTCCCTGGCCATGATGCCCCCAAGTCAGATGGGTCACTTTCATTATGGGAG  
ATTATGGGAGCTTTACCAGATCACAAACCAAGTGTGGTGGCAACTACATCCCAAACTCGAGGACTTCTTGGTGGTCAAGTATGGGAGCTCAAGACTATGGGAG  
ACTATGGAGGACATGAAGAGAAAGCAATGGCTAAGCTTAGACAGCATCTACTAGTAGCCAGAATGCAGAACCTGAAGCCACAGAGACCATCTTCTCTTTGGG  
TTCTTTGGGCTTCTTTCTGACCCCTCAGGCAACAAACCATCCATATCTCGGGCTTGGGATTTACCAAGTGGAGGAGGAAAGCAAGCAACCCCAACGTGACAGTTT  
GTGACAGTTTGCAGCTCCCAATGCCTCAAGTGGTGGAGAAAGGCAATGTCATGCTTCAAAAACCTGGGTGCCCAAGGGGATATCTTCTCTCAGCAGAACTCGGAGCA  
ATCTGGAGCAGCAGCATCAAGTGAATAACAGATATGGGGGAGAATCACGGTCTTGGGAAATGTTGGTGTGTTGGTGTGGGAGTTGACGTCTTTGAGTTTGTCT  
GAGTTTGTCTATGAGTCTGTTCTCACTAGCTGTGTCACAGTTCCAACCTCAGATCTCATCTTCTGGGACTGAATCAGTGGTGGGGATGCCAAAAGAGAGGTTCTG  
AGAGTTCTGCTAAGCTCGGCCAGAAAGCAACCTGTCATAGGAAATCCATTGACACATTGCGCCAGAGAATCTCAGTATAGAGGTGTACAAAGGCATCGATGGACTGG  
GATGGACTGGAAGATATGAAGCACATTTGTGGGATAATAGCTGCAAGAAGGAAGGCAAAACAGGAAGGACGACAAGTTATTTGGTGGTTATGATGGAAGAGAAA  
GGAAGAGAAAAGCTGCAAGAGCATATGATCTGCGGCTCAAGTATTGGGACCTTCAACGCACATAAACTCCCGCTAGAAAATACCAAACTGAACCTGAAGAAAATGA  
GAAGAAAATGAAGAAATGAGCAGGCAGGAAATGTGGCCACTTGAGAAAGAAAGAGTAGTGGGTTTTCAAGGGTGCCTCAAGTACAGAGGAGTGACAAGACACCATCA  
GACACCATCAACATGGCAGGTGGCAAGCAAGGATAGGAGAGTTGCAGGAAAATAGGACCTTATCTTGGGACTCAGTACTCAAGAGGAGCAGCTGAAGCATAAGC  
AGCATAAGCAGTGTGCAATCAAGTTTCTGGGGTGAATGCTGTGACCAACTTTGACATCTCAAGATACGATGTTGAGAGGATCATGGCCAGCAACACCTTCTTCTG  
CTTCTTGGTGGAGAGTTGGCAAGAAAGAAACAGGAGAGTGAAGCAAGAACTGAGGACACAGAGTACAACGTTGTGTCAAGCAACAGCCATAAGCAGCAGCAGGGAAGA  
GCAGGGAAGAAGCTGAGACTGTGAACAACAATGACAATAATGAGAAGGGATCATCATCAGATTGGAAGATGGGTTGTATCATCAACAACAGTCAACAGCAACAACCTGT  
CAACAACCTGTGACATGAAAACCATGAAGTGTGAAAATATAGAGGTTCTGCTTCTCTGTGCTTCAAGATCTCATTGGGATTGACTCAGTAGGATCTAGCCAGGCCA  
AGCCAGGCCATGCTGGAGGAGTCTACTAAGATAGGCACCTATTTTCAAACCCCTCTCGCTGGTCAACAGTTTAAAGCAGCTCAAGGGAAGGTAGCCCTGACAAAACGGG  
ACAAAACGGGCTCCACTGTGCTTTTCAAAGCCTCCGGTGGGGTCAAGGTTGTCACTAGCCCTATTGCTAATGGTGAAGTGTGGCTTCTGGTTCCTCTCAAATG  
CTCTCAAATGAGGCCAGTGGCAATGTCTCACTTGGCAGTTTTGTGTCATGGAGTGATACCTG

Summary Sequences Annotation Physical Properties SSRs Expression Cis-elements O

|                 |                    |
|-----------------|--------------------|
| TF ID:          | Phvul.001G031200.1 |
| Chromosome:     | Pv01               |
| Gene Start:     | 2907733            |
| Gene End:       | 2912245            |
| Orientation:    | +                  |
| CDS Length:     | 2064               |
| Gene Length:    | 4512               |
| Protein Length: | 687                |
| TF Family:      | AP2                |

# SEARCH BY GENE ID (Cont.)

III

|                         |                           |                            |                                     |                      |                            |                              |                           |                         |
|-------------------------|---------------------------|----------------------------|-------------------------------------|----------------------|----------------------------|------------------------------|---------------------------|-------------------------|
| <a href="#">Summary</a> | <a href="#">Sequences</a> | <a href="#">Annotation</a> | <a href="#">Physical Properties</a> | <a href="#">SSRs</a> | <a href="#">Expression</a> | <a href="#">Cis-elements</a> | <a href="#">Orthologs</a> | <a href="#">Go Back</a> |
|-------------------------|---------------------------|----------------------------|-------------------------------------|----------------------|----------------------------|------------------------------|---------------------------|-------------------------|

| Database     | Accession ID              | Description                                                      | Start | End | E-value |
|--------------|---------------------------|------------------------------------------------------------------|-------|-----|---------|
| Pfam         | <a href="#">PF00847</a>   | AP2_domain                                                       | 429   | 478 | 6.9E-12 |
| Pfam         | <a href="#">PF00847</a>   | AP2_domain                                                       | 325   | 384 | 1.1E-13 |
| SMART        | <a href="#">SM00380</a>   | DNA-binding_domain_in_plant_proteins_such_as_APETALA2_and_EREBPs | 428   | 492 | 4.9E-34 |
| SMART        | <a href="#">SM00380</a>   | DNA-binding_domain_in_plant_proteins_such_as_APETALA2_and_EREBPs | 326   | 398 | 1.8E-28 |
| PRINTS       | <a href="#">PR00367</a>   | Ethylene_responsive_element_binding_protein_signature            | 327   | 338 | 3.4E-6  |
| PRINTS       | <a href="#">PR00367</a>   | Ethylene_responsive_element_binding_protein_signature            | 468   | 488 | 3.4E-6  |
| InterProScan | <a href="#">IPR001471</a> | AP2/ERF_domain                                                   |       |     |         |
| InterProScan | <a href="#">IPR016177</a> | DNA-binding_domain                                               |       |     |         |

IV

|                         |                           |                            |                                     |                      |                            |                              |                           |                         |
|-------------------------|---------------------------|----------------------------|-------------------------------------|----------------------|----------------------------|------------------------------|---------------------------|-------------------------|
| <a href="#">Summary</a> | <a href="#">Sequences</a> | <a href="#">Annotation</a> | <a href="#">Physical Properties</a> | <a href="#">SSRs</a> | <a href="#">Expression</a> | <a href="#">Cis-elements</a> | <a href="#">Orthologs</a> | <a href="#">Go Back</a> |
|-------------------------|---------------------------|----------------------------|-------------------------------------|----------------------|----------------------------|------------------------------|---------------------------|-------------------------|

|                 |                                   |
|-----------------|-----------------------------------|
| ProSiteProfiles | <a href="#">PS51032</a>           |
| ProSiteProfiles | <a href="#">PS51032</a>           |
| SUPERFAMILY     | <a href="#">SSF54171</a>          |
| SUPERFAMILY     | <a href="#">SSF54171</a>          |
| Gene3D          | <a href="#">G3DSA:3.30.730.10</a> |
| Gene3D          | <a href="#">G3DSA:3.30.730.10</a> |
| PANTHER         | <a href="#">PTHR32467:SF0</a>     |
| PANTHER         | <a href="#">PTHR32467</a>         |
| GO              | <a href="#">GO:0006355</a>        |
| GO              | <a href="#">GO:0003700</a>        |
| GO              | <a href="#">GO:0007275</a>        |

|                          |                                |
|--------------------------|--------------------------------|
| Molecular Weight (Da):   | 75431.6671                     |
| Aromaticity:             | 0.077                          |
| Instability Index:       | 49.51 [Stable < 40 > Unstable] |
| Isoelectric Point (pI):  | 6.639                          |
| Fraction of Amino Acids: |                                |
| <i>in Helix:</i>         | 0.2212                         |
| <i>in Turn:</i>          | 0.3158                         |
| <i>in Sheet:</i>         | 0.2241                         |

# SEARCH BY GENE ID (Cont.)

V

|                         |                           |                            |                                     |                      |                            |                              |                           |                         |
|-------------------------|---------------------------|----------------------------|-------------------------------------|----------------------|----------------------------|------------------------------|---------------------------|-------------------------|
| <a href="#">Summary</a> | <a href="#">Sequences</a> | <a href="#">Annotation</a> | <a href="#">Physical Properties</a> | <a href="#">SSRs</a> | <a href="#">Expression</a> | <a href="#">Cis-elements</a> | <a href="#">Orthologs</a> | <a href="#">Go Back</a> |
|-------------------------|---------------------------|----------------------------|-------------------------------------|----------------------|----------------------------|------------------------------|---------------------------|-------------------------|

  

| SSR Motif | Motif Length | Motif Repeat | Motif Repeat Length | SSR Motif Sequence | Get                     |
|-----------|--------------|--------------|---------------------|--------------------|-------------------------|
| AGC       | 3            | 3            | 9                   | AGCAGCAGC          | <a href="#">Primers</a> |
| ATC       | 3            | 3            | 9                   | ATCATCATC          | <a href="#">Primers</a> |
| CAT       | 3            | 3            | 9                   | CATCATCAT          | <a href="#">Primers</a> |
| CTG       | 3            | 3            | 9                   | CTGCTGCTG          | <a href="#">Primers</a> |
| CTT       | 3            | 3            | 9                   | CTTCTTCTT          | <a href="#">Primers</a> |
| GGA       | 3            | 3            | 9                   | GGAGGAGGA          | <a href="#">Primers</a> |

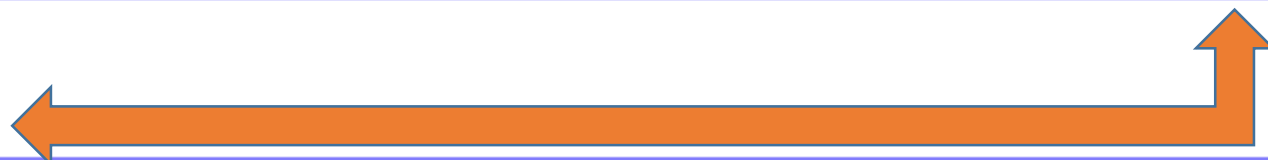

## Primer Details:

| Forward Primer        | Start | Length | Tm <sup>0</sup> <sub>C</sub> | GC %  | Product Size | Reverse Primer        | Start | Length | Tm <sup>0</sup> <sub>C</sub> | GC %  |
|-----------------------|-------|--------|------------------------------|-------|--------------|-----------------------|-------|--------|------------------------------|-------|
| ATTCTTCCTCTCAGCAGAATC | 683   | 21     | 55.25                        | 42.86 | 146          | TTGAGAACCAGGACTCATAGA | 828   | 21     | 54.92                        | 42.86 |
| ATTCTTCCTCTCAGCAGAATC | 683   | 21     | 55.25                        | 42.86 | 152          | GCTAGATTGAGAACCAGGACT | 834   | 21     | 55.21                        | 47.62 |
| ATTCTTCCTCTCAGCAGAATC | 683   | 21     | 55.25                        | 42.86 | 149          | AGATTGAGAACCAGGACTCAT | 831   | 21     | 55.29                        | 42.86 |
| GCAAGAAGAAACAAGGAGAGT | 1519  | 21     | 55.41                        | 42.86 | 145          | AATCTGATGATGATCCCTTCT | 1663  | 21     | 55.13                        | 38.1  |
| GATACGATGTTGAGAGGATCA | 1466  | 21     | 55.13                        | 42.86 | 163          | TTGTTACAGTCTCAGCTTCT  | 1628  | 21     | 55.24                        | 42.86 |
| CAAGAAGAAACAAGGAGAGTG | 1520  | 21     | 54.31                        | 42.86 | 144          | AATCTGATGATGATCCCTTCT | 1663  | 21     | 55.13                        | 38.1  |

VI

# SEARCH BY GENE ID (Cont.)

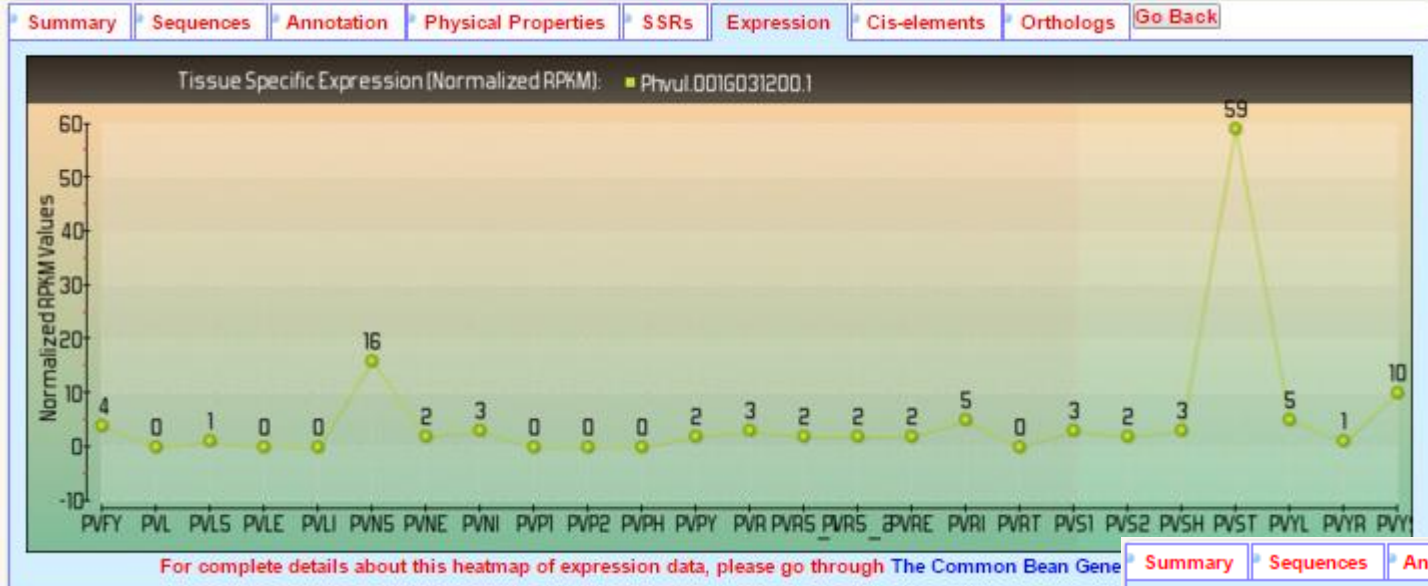

VIII

Summary Sequences Annotation Physical Properties SSRs Expression Cis-elements Orthologs Go Back

| Site Name     | Location | Strand | Signal Sequence | Site ID |
|---------------|----------|--------|-----------------|---------|
| ARR1AT        | 9        | -      | NGATT           | S000454 |
| ARR1AT        | 14       | -      | NGATT           | S000454 |
| POLASIG2      | 27       | +      | AATTA           | S000081 |
| SEF4MOTIFGM7S | 30       | -      | RTTTTTR         | S000103 |
| CACTFTPPCA1   | 37       | +      | YACT            | S000449 |
| WBOXNCHN48    | 39       | +      | CTGACY          | S000508 |
| WBOXHVIS01    | 40       | +      | TGACT           | S000442 |
| WRKY71OS      | 40       | +      | TGAC            | S000447 |
| WBOXNTERF3    | 40       | +      | TGACY           | S000457 |
| TATABOX5      | 45       | -      | TTATTT          | S000203 |
| POLASIG3      | 46       | +      | AATAAT          | S000088 |

Summary Sequences Annotation Physical Properties SSRs Expression Cis-elements Orthologs Go Back

| Plant           | Ortholog ID     | Identity (%) | Start | End | E-Value |
|-----------------|-----------------|--------------|-------|-----|---------|
| Lotus japonicus | Lj0g3v0070889.2 | 95.00        | 213   | 232 | 1e-05   |
| Lotus japonicus | Lj0g3v0070889.1 | 95.00        | 158   | 177 | 5e-06   |
| AdzukiBean      | Vang01g18250.1  | 91.19        | 1     | 690 | 0.0     |
| Lotus japonicus | Lj3g3v2612440.1 | 86.92        | 1     | 107 | 1e-59   |
| Pigeonpea       | C.cajan_04959   | 86.46        | 147   | 503 | 0.0     |
| Lotus japonicus | Lj2g3v1455120.1 | 84.78        | 211   | 256 | 3e-21   |
| Soybean         | Glyma09g33241.1 | 84.78        | 211   | 256 | 2e-21   |
| Pigeonpea       | C.cajan_18251   | 84.69        | 200   | 395 | 2e-114  |
| Soybean         | Glyma14g10130.2 | 84.36        | 1     | 599 | 0.0     |
| Soybean         | Glyma0041s50.1  | 84.34        | 1     | 529 | 0.0     |
| Mungbean        | Vradi06g14410.1 | 82.31        | 1     | 626 | 0.0     |
| Lotus japonicus | Lj4g3v2120330.1 | 81.08        | 1     | 111 | 5e-56   |
| Soybean         | Glyma17g07010.1 | 80.98        | 134   | 337 | 4e-117  |
| Soybean         | Glyma13g00950.1 | 80.98        | 130   | 333 | 2e-117  |
| Pigeonpea       | C.cajan_03656   | 80.79        | 132   | 333 | 1e-116  |
| Lotus japonicus | Lj1g3v2841310.1 | 80.36        | 133   | 188 | 1e-24   |

VII

# SEARCH BY FUNCTION

by Gene ID

by Function

## Search by Function

|                     |                                            |                                                                            |
|---------------------|--------------------------------------------|----------------------------------------------------------------------------|
| GO ID:              | <input type="text" value="GO:0003677"/>    | <input type="button" value="Submit"/> <input type="button" value="Reset"/> |
| Pfam ID:            | <input type="text" value="eg: PF00847"/>   | <input type="button" value="Submit"/> <input type="button" value="Reset"/> |
| SMART ID:           | <input type="text" value="eg: SM01019"/>   |                                                                            |
| InterProScan ID:    | <input type="text" value="eg: IPR003340"/> |                                                                            |
| ProSiteProfiles ID: | <input type="text" value="eg: PS50863"/>   |                                                                            |

There are 945 Transcription Factors are present with GO ID: GO:0003677

Phvul.001G008200.1 Phvul.001G011000.1 Phvul.001G011000.2 Phvul.001G011100.1 Phvul.001G018400.1  
Phvul.001G018500.1 Phvul.001G018500.2 Phvul.001G018500.3 Phvul.001G018500.4 Phvul.001G023400.1  
Phvul.001G023600.1 Phvul.001G032200.1 Phvul.001G032200.2 Phvul.001G034200.1 Phvul.001G059900.1  
Phvul.001G059900.2 Phvul.001G062100.1 Phvul.001G068200.1 Phvul.001G072200.1 Phvul.001G080800.1  
Phvul.001G086800.1 Phvul.001G091100.1 Phvul.001G091400.1 Phvul.001G100200.1 Phvul.001G100500.1  
Phvul.001G106400.1 Phvul.001G106700.1 Phvul.001G117200.1 Phvul.001G126400.1 Phvul.001G141000.1  
Phvul.001G143500.1 Phvul.001G161700.1 Phvul.001G175700.1 Phvul.001G176100.1 Phvul.001G184800.1  
Phvul.001G184900.1 Phvul.001G186400.1 Phvul.001G192000.1 Phvul.001G193100.1 Phvul.001G195800.1  
Phvul.001G196100.1 Phvul.001G196900.1 Phvul.001G202000.1 Phvul.001G224900.1 Phvul.001G228600.1  
Phvul.001G241000.1 Phvul.001G254000.1 Phvul.001G262600.1 Phvul.001G263000.1 Phvul.001G263400.1  
Phvul.001G263400.2 Phvul.002G008600.1 Phvul.002G010300.1 Phvul.002G022000.1 Phvul.002G024800.1  
Phvul.002G027200.1 Phvul.002G048200.1 Phvul.002G048200.2 Phvul.002G049800.1 Phvul.002G056300.1  
Phvul.002G061000.1 Phvul.002G061000.2 Phvul.002G064100.1 Phvul.002G064100.2 Phvul.002G067200.1  
Phvul.002G084000.1 Phvul.002G085700.1 Phvul.002G088600.1 Phvul.002G094100.1 Phvul.002G095800.1  
Phvul.002G100800.1 Phvul.002G100800.2 Phvul.002G109400.1 Phvul.002G110900.1 Phvul.002G111600.1  
Phvul.002G112200.1 Phvul.002G112200.2 Phvul.002G114500.1 Phvul.002G114500.2 Phvul.002G137000.1  
Phvul.002G143900.1 Phvul.002G143900.2 Phvul.002G144900.1 Phvul.002G147600.1 Phvul.002G153300.1  
Phvul.002G159000.1 Phvul.002G170200.1 Phvul.002G170400.1 Phvul.002G170600.1 Phvul.002G171600.1  
Phvul.002G172300.1 Phvul.002G172300.2 Phvul.002G172800.1 Phvul.002G177600.1 Phvul.002G183400.1  
Phvul.002G187900.1 Phvul.002G194600.1 Phvul.002G197500.1 Phvul.002G206300.1 Phvul.002G209300.1  
Phvul.002G212400.1 Phvul.002G215500.1 Phvul.002G224900.1 Phvul.002G226100.1 Phvul.002G229100.1  
Phvul.002G229800.1 Phvul.002G229800.2 Phvul.002G230100.1 Phvul.002G230200.1 Phvul.002G230300.1

Summary Sequences Annotation Physical Properties SSRs Expression Cis-elements

|                 |                    |
|-----------------|--------------------|
| TF ID:          | Phvul.001G008200.1 |
| Chromosome:     | Pv01               |
| Gene Start:     | 704238             |
| Gene End:       | 709592             |
| Orientation:    | +                  |
| CDS Length:     | 2814               |
| Gene Length:    | 5354               |
| Protein Length: | 937                |
| TF Family:      | ARF                |



# SEARCH BY FUNCTION (Cont.)

## Search by Function

|                     |                                             |                                                                            |
|---------------------|---------------------------------------------|----------------------------------------------------------------------------|
| GO ID:              | <input type="text" value="eg: GO:0003877"/> | <input type="button" value="Submit"/> <input type="button" value="Reset"/> |
| Pfam ID:            | <input type="text" value="PF00847"/>        | <input type="button" value="Submit"/> <input type="button" value="Reset"/> |
| SMART ID:           | <input type="text" value="eg: SM01019"/>    | <input type="button" value="Submit"/> <input type="button" value="Reset"/> |
| InterProScan ID:    | <input type="text" value="eg: IPR003340"/>  | <input type="button" value="Submit"/> <input type="button" value="Reset"/> |
| ProSiteProfiles ID: | <input type="text" value="eg: PS50863"/>    | <input type="button" value="Submit"/> <input type="button" value="Reset"/> |

[Summary](#) [Sequences](#) [Annotation](#) [Physical Properties](#) [SSRs](#) [Expression](#) [Cis-elements](#) [Orthologs](#) [Go Back](#)

|                 |                    |
|-----------------|--------------------|
| TF ID:          | Phvul.002G009100.1 |
| Chromosome:     | Pv02               |
| Gene Start:     | 1058028            |
| Gene End:       | 1061555            |
| Orientation:    | -                  |
| CDS Length:     | 1797               |
| Gene Length:    | 3527               |
| Protein Length: | 598                |
| TF Family:      | AP2                |

There are 220 Transcription Factors are present with Pfam ID: PF00847

Phvul.002G009100.1 Phvul.002G009100.1 Phvul.002G056800.1 Phvul.002G267800.1 Phvul.005G138300.1  
Phvul.005G138300.1 Phvul.008G019600.1 Phvul.003G069000.1 Phvul.003G069000.1 Phvul.009G251600.1  
Phvul.005G126600.1 Phvul.005G170600.1 Phvul.011G071100.1 Phvul.011G071100.1 Phvul.007G102800.1  
Phvul.007G102800.1 Phvul.007G082000.1 Phvul.007G082000.2 Phvul.010G035200.1 Phvul.002G035900.1  
Phvul.001G160300.1 Phvul.002G009100.2 Phvul.002G009100.2 Phvul.007G272800.1 Phvul.005G126300.1  
Phvul.006G047800.1 Phvul.009G123300.1 Phvul.008G246000.1 Phvul.008G043500.1 Phvul.008G043500.1  
Phvul.001G023700.1 Phvul.003G165000.1 Phvul.009G074300.1 Phvul.009G074300.1 Phvul.007G241600.1  
Phvul.002G055800.1 Phvul.005G105200.1 Phvul.008G046400.1 Phvul.010G092300.1 Phvul.004G081200.1  
Phvul.001G137500.1 Phvul.010G050600.1 Phvul.008G131500.2 Phvul.006G163100.1 Phvul.002G163700.1  
Phvul.010G130200.1 Phvul.010G130200.1 Phvul.002G295700.1 Phvul.003G212700.1 Phvul.004G169800.1  
Phvul.007G128100.1 Phvul.001G031200.1 Phvul.001G031200.1 Phvul.002G016900.1 Phvul.002G016900.1  
Phvul.003G111800.1 Phvul.003G111800.1 Phvul.010G050700.1 Phvul.002G016700.1 Phvul.001G131300.1  
Phvul.007G135300.1 Phvul.007G128000.1 Phvul.003G232600.1 Phvul.003G232600.1 Phvul.010G114900.1  
Phvul.001G160400.1 Phvul.003G180000.1 Phvul.008G159400.1 Phvul.002G153900.1 Phvul.002G149500.1  
Phvul.011G058000.1 Phvul.011G058000.1 Phvul.004G122000.1 Phvul.008G271100.1 Phvul.009G137000.1  
Phvul.001G157600.1 Phvul.011G107800.1 Phvul.011G107800.2 Phvul.008G172200.1 Phvul.003G223600.1  
Phvul.001G187100.1 Phvul.003G035500.1 Phvul.010G124700.1 Phvul.009G013200.1 Phvul.007G255100.1

# SEARCH BY FUNCTION (Cont.)

## Search by Function

|                            |                                             |                                                                            |
|----------------------------|---------------------------------------------|----------------------------------------------------------------------------|
| <b>GO ID:</b>              | <input type="text" value="eg: GO:0003677"/> | <input type="button" value="Submit"/> <input type="button" value="Reset"/> |
| <b>Pfam ID:</b>            | <input type="text" value="eg: PF00847"/>    | <input type="button" value="Submit"/> <input type="button" value="Reset"/> |
| <b>SMART ID:</b>           | <input type="text" value="SM01019"/>        | <input type="button" value="Submit"/> <input type="button" value="Reset"/> |
| <b>InterProScan ID:</b>    | <input type="text" value="eg: IPR003340"/>  | <input type="button" value="Submit"/> <input type="button" value="Reset"/> |
| <b>ProSiteProfiles ID:</b> | <input type="text" value="eg: PS50863"/>    | <input type="button" value="Submit"/> <input type="button" value="Reset"/> |

There are 123 Transcription Factors are present with SMART ID: SM01019

Phvul.006G181200.1 Phvul.001G018500.2 Phvul.001G018500.2 Phvul.001G018500.2 Phvul.001G018500.3  
 Phvul.001G018500.3 Phvul.001G018500.3 Phvul.002G229800.2 Phvul.007G102800.1 Phvul.007G102800.1  
 Phvul.003G128800.1 Phvul.009G064100.1 Phvul.006G100700.1 Phvul.006G100700.1 Phvul.006G079300.2  
 Phvul.006G079300.1 Phvul.010G120900.3 Phvul.010G120900.1 Phvul.010G120900.2 Phvul.010G11600.1  
 Phvul.011G050800.1 Phvul.011G050800.1 Phvul.001G018500.4 Phvul.001G018500.4 Phvul.001G018500.4  
 Phvul.001G018500.1 Phvul.001G018500.1 Phvul.001G018500.1 Phvul.008G244300.1 Phvul.002G282200.1  
 Phvul.011G073600.2 Phvul.001G008200.1 Phvul.007G022900.1 Phvul.007G022900.1 Phvul.009G169300.1  
 Phvul.006G114300.1 Phvul.007G149000.1 Phvul.007G019500.1 Phvul.007G019500.1 Phvul.003G011300.1  
 Phvul.003G011300.1 Phvul.011G050700.2 Phvul.011G050700.2 Phvul.011G050700.1 Phvul.011G050700.1  
 Phvul.009G260100.1 Phvul.003G111800.1 Phvul.003G111800.1 Phvul.003G033400.1 Phvul.003G033400.1  
 Phvul.003G033400.1 Phvul.005G134500.2 Phvul.001G193100.1 Phvul.001G018400.1 Phvul.001G018400.1  
 Phvul.006G084200.2 Phvul.002G229800.1 Phvul.002G177600.1 Phvul.008G197600.1 Phvul.008G220000.1  
 Phvul.011G080100.1 Phvul.005G136900.1 Phvul.008G247500.1 Phvul.002G233600.1 Phvul.008G242400.1  
 Phvul.003G075800.1 Phvul.007G002900.1 Phvul.007G002900.1 Phvul.003G007600.1 Phvul.003G007600.1  
 Phvul.003G007600.2 Phvul.003G007600.2 Phvul.011G050600.2 Phvul.011G050600.2 Phvul.008G118400.1  
 Phvul.011G050600.1 Phvul.011G050600.1 Phvul.008G140200.1 Phvul.011G073600.1 Phvul.008G118400.2  
 Phvul.003G007500.1 Phvul.003G007500.1 Phvul.007G041900.1 Phvul.007G041900.1 Phvul.007G041900.1  
 Phvul.009G169300.2 Phvul.007G019600.1 Phvul.007G019600.1 Phvul.011G050500.1 Phvul.001G202000.1  
 Phvul.005G000700.1 Phvul.005G000700.1 Phvul.010G070200.2 Phvul.010G070200.1 Phvul.007G019400.1  
 Phvul.007G019400.1 Phvul.007G019400.1 Phvul.008G122100.1 Phvul.009G169300.5 Phvul.009G026200.1  
 Phvul.005G134500.1 Phvul.003G007600.3 Phvul.003G007600.3 Phvul.003G007600.4 Phvul.003G007600.4  
 Phvul.007G230700.1 Phvul.009G161900.1 Phvul.006G191700.1 Phvul.004G177600.1 Phvul.008G168700.1  
 Phvul.006G084200.1 Phvul.003G290200.1 Phvul.008G140100.1 Phvul.007G019700.1 Phvul.007G019700.1  
 Phvul.007G095000.1 Phvul.001G086800.1 Phvul.003G007400.1 Phvul.003G007400.1 Phvul.009G224800.1  
 Phvul.003G244400.1 Phvul.006G221500.1 Phvul.003G011300.2

Summary Sequences Annotation Physical Properties SSRs Expression Cis-elements Orthologs Gr

|                        |                    |
|------------------------|--------------------|
| <b>TF ID:</b>          | Phvul.006G181200.1 |
| <b>Chromosome:</b>     | Pv06               |
| <b>Gene Start:</b>     | 29058029           |
| <b>Gene End:</b>       | 29064102           |
| <b>Orientation:</b>    | +                  |
| <b>CDS Length:</b>     | 2205               |
| <b>Gene Length:</b>    | 6073               |
| <b>Protein Length:</b> | 734                |
| <b>TF Family:</b>      | ARF                |

# SEARCH BY FUNCTION (Cont.)

## Search by Function

|                            |                                             |                                                                            |
|----------------------------|---------------------------------------------|----------------------------------------------------------------------------|
| <b>GO ID:</b>              | <input type="text" value="eg: GO:0003677"/> | <input type="button" value="Submit"/> <input type="button" value="Reset"/> |
| <b>Pfam ID:</b>            | <input type="text" value="eg: PF00847"/>    | <input type="button" value="Submit"/> <input type="button" value="Reset"/> |
| <b>SMART ID:</b>           | <input type="text" value="eg: SM01019"/>    | <input type="button" value="Submit"/> <input type="button" value="Reset"/> |
| <b>InterProScan ID:</b>    | <input type="text" value="IPR003340"/>      | <input type="button" value="Submit"/> <input type="button" value="Reset"/> |
| <b>ProSiteProfiles ID:</b> | <input type="text" value="eg: PS50863"/>    | <input type="button" value="Submit"/> <input type="button" value="Reset"/> |

[Annotation](#) | 
 [Physical Properties](#) | 
 [SSRs](#) | 
 [Expression](#) | 
 [Cis-elements](#) | 
 [Orthologs](#) | 
 [Go Back](#)

|                 |                    |
|-----------------|--------------------|
| TF ID:          | Phvul.006G181200.1 |
| Chromosome:     | Pv08               |
| Gene Start:     | 29058029           |
| Gene End:       | 29064102           |
| Orientation:    | +                  |
| CDS Length:     | 2205               |
| Gene Length:    | 6073               |
| Protein Length: | 734                |
| TF Family:      | ARF                |

There are 99 Transcription Factors are present with InterProScan ID: IPR003340

Phvul.006G181200.1 Phvul.001G018500.2 Phvul.001G018500.3 Phvul.004G169400.1 Phvul.002G229800.2  
 Phvul.007G102800.1 Phvul.007G102800.1 Phvul.003G128800.1 Phvul.009G064100.1 Phvul.006G100700.1  
 Phvul.006G079300.2 Phvul.006G079300.1 Phvul.010G120900.3 Phvul.010G120900.1 Phvul.010G120900.2  
 Phvul.010G011600.1 Phvul.011G050800.1 Phvul.001G018500.4 Phvul.001G018500.1 Phvul.008G244300.1  
 Phvul.002G282200.1 Phvul.011G073600.2 Phvul.001G008200.1 Phvul.007G022900.1 Phvul.005G031300.1  
 Phvul.009G169300.1 Phvul.006G114300.1 Phvul.007G149000.1 Phvul.007G019500.1 Phvul.003G011300.1  
 Phvul.011G050700.2 Phvul.011G050700.1 Phvul.009G260100.1 Phvul.003G111800.1 Phvul.003G111800.1  
 Phvul.003G033400.1 Phvul.005G134500.2 Phvul.001G193100.1 Phvul.001G018400.1 Phvul.006G084200.2  
 Phvul.002G229800.1 Phvul.002G177600.1 Phvul.008G197600.1 Phvul.008G220000.1 Phvul.011G080100.1  
 Phvul.005G136900.1 Phvul.009G169300.6 Phvul.008G247500.1 Phvul.002G233600.1 Phvul.008G242400.1  
 Phvul.003G075800.1 Phvul.007G002900.1 Phvul.007G002900.1 Phvul.003G007600.1 Phvul.003G007600.2  
 Phvul.011G050600.2 Phvul.008G118400.1 Phvul.011G050600.1 Phvul.008G140200.1 Phvul.004G169500.1  
 Phvul.011G073600.1 Phvul.008G118400.2 Phvul.003G007500.1 Phvul.007G041900.1 Phvul.009G169300.2  
 Phvul.007G019600.1 Phvul.011G050500.1 Phvul.001G202000.1 Phvul.005G000700.1 Phvul.010G070200.2  
 Phvul.010G070200.1 Phvul.007G019400.1 Phvul.008G122100.1 Phvul.009G169300.5 Phvul.009G026200.1  
 Phvul.005G134500.1 Phvul.003G007600.3 Phvul.003G007600.4 Phvul.007G230700.1 Phvul.009G161900.1  
 Phvul.009G169300.4 Phvul.006G191700.1 Phvul.004G177600.1 Phvul.008G168700.1 Phvul.006G084200.1  
 Phvul.003G290200.1 Phvul.009G169300.3 Phvul.008G140100.1 Phvul.002G100800.2 Phvul.007G019700.1  
 Phvul.007G095000.1 Phvul.001G086800.1 Phvul.003G007400.1 Phvul.009G224800.1 Phvul.003G244400.1  
 Phvul.002G100800.1 Phvul.006G221500.1 Phvul.003G011300.2

# SEARCH BY FUNCTION (Cont.)

## Search by Function

|                     |                                             |        |       |
|---------------------|---------------------------------------------|--------|-------|
| GO ID:              | <input type="text" value="eg: GO:0003677"/> | Submit | Reset |
| Pfam ID:            | <input type="text" value="eg: PF00847"/>    | Submit | Reset |
| SMART ID:           | <input type="text" value="eg: SM01019"/>    | Submit | Reset |
| InterProScan ID:    | <input type="text" value="eg: IPR003340"/>  | Submit | Reset |
| ProSiteProfiles ID: | <input type="text" value="PS50863"/>        | Submit | Reset |

There are 136 Transcription Factors are present with PrositeProfile ID: PS50863

Phvul.006G181200.1 Phvul.001G018500.2 Phvul.001G018500.2 Phvul.001G018500.2 Phvul.001G018500.3  
 Phvul.001G018500.3 Phvul.001G018500.3 Phvul.004G169400.1 Phvul.002G229800.2 Phvul.007G102800.1  
 Phvul.007G102800.1 Phvul.003G128800.1 Phvul.009G064100.1 Phvul.006G100700.1 Phvul.006G100700.1  
 Phvul.006G079300.2 Phvul.006G079300.1 Phvul.010G120900.3 Phvul.010G120900.1 Phvul.010G120900.2  
 Phvul.010G011600.1 Phvul.011G050800.1 Phvul.011G050800.1 Phvul.001G018500.4 Phvul.001G018500.4  
 Phvul.001G018500.4 Phvul.001G018500.1 Phvul.001G018500.1 Phvul.001G018500.1 Phvul.008G244300.1  
 Phvul.002G282200.1 Phvul.011G073600.2 Phvul.001G008200.1 Phvul.007G022900.1 Phvul.007G022900.1  
 Phvul.005G031300.1 Phvul.009G169300.1 Phvul.009G169300.1 Phvul.006G114300.1 Phvul.007G149000.1  
 Phvul.007G019500.1 Phvul.007G019500.1 Phvul.003G011300.1 Phvul.003G011300.1 Phvul.011G050700.2  
 Phvul.011G050700.2 Phvul.011G050700.1 Phvul.011G050700.1 Phvul.009G260100.1 Phvul.003G111800.1  
 Phvul.003G111800.1 Phvul.003G033400.1 Phvul.003G033400.1 Phvul.003G033400.1 Phvul.005G134500.2  
 Phvul.001G193100.1 Phvul.001G018400.1 Phvul.001G018400.1 Phvul.006G084200.2 Phvul.002G229800.1  
 Phvul.002G177600.1 Phvul.008G197600.1 Phvul.008G220000.1 Phvul.008G220000.1 Phvul.011G080100.1  
 Phvul.005G136900.1 Phvul.009G169300.6 Phvul.008G247500.1 Phvul.002G233600.1 Phvul.008G242400.1  
 Phvul.003G075800.1 Phvul.007G002900.1 Phvul.007G002900.1 Phvul.003G007600.1 Phvul.003G007600.1  
 Phvul.003G007600.2 Phvul.003G007600.2 Phvul.011G050600.2 Phvul.011G050600.2 Phvul.008G118400.1  
 Phvul.011G050600.1 Phvul.011G050600.1 Phvul.004G169500.1 Phvul.011G073600.1 Phvul.008G118400.2  
 Phvul.003G007500.1 Phvul.003G007500.1 Phvul.007G041900.1 Phvul.007G041900.1 Phvul.007G041900.1  
 Phvul.009G169300.2 Phvul.009G169300.2 Phvul.007G019600.1 Phvul.007G019600.1 Phvul.011G050500.1  
 Phvul.001G202000.1 Phvul.005G000700.1 Phvul.005G000700.1 Phvul.010G070200.2 Phvul.010G070200.1  
 Phvul.007G019400.1 Phvul.007G019400.1 Phvul.007G019400.1 Phvul.008G122100.1 Phvul.009G169300.5  
 Phvul.009G026200.1 Phvul.005G134500.1 Phvul.003G007600.3 Phvul.003G007600.3 Phvul.003G007600.4  
 Phvul.003G007600.4 Phvul.007G230700.1 Phvul.009G161900.1 Phvul.009G169300.4 Phvul.009G169300.4  
 Phvul.006G191700.1 Phvul.004G177600.1 Phvul.008G168700.1 Phvul.006G084200.1 Phvul.003G290200.1  
 Phvul.009G169300.3 Phvul.009G169300.3 Phvul.008G140100.1 Phvul.002G100800.2 Phvul.007G019700.1  
 Phvul.007G019700.1 Phvul.007G095000.1 Phvul.003G007400.1 Phvul.003G007400.1 Phvul.009G224800.1  
 Phvul.003G244400.1 Phvul.002G100800.1 Phvul.006G221500.1 Phvul.003G011300.2

Summary Sequences Annotation Physical Properties SSRs Expression Cis-elements Orthologs

|                 |                    |
|-----------------|--------------------|
| TF ID:          | Phvul.008G181200.1 |
| Chromosome:     | Pv08               |
| Gene Start:     | 29058029           |
| Gene End:       | 29084102           |
| Orientation:    | +                  |
| CDS Length:     | 2205               |
| Gene Length:    | 6073               |
| Protein Length: | 734                |
| TF Family:      | ARF                |

# BROWSE BY FAMILY

|           |               |               |                         |                   |          |            |
|-----------|---------------|---------------|-------------------------|-------------------|----------|------------|
| Home      | Search ▾      | Browse ▾      | References              | Tutorial          | Download | Contact Us |
|           |               | by Family     |                         |                   |          |            |
|           |               | by Chromosome | <b>Browse by Family</b> |                   |          |            |
| AP2 (25)  | ARF (31)      | ARR-B (60)    | B3 (61)                 | BBR-BPC (9)       |          |            |
| BES1 (7)  | C2H2 (211)    | C3H (95)      | CAMTA (13)              | CO-like (18)      |          |            |
| CPP (6)   | DBB (12)      | Dof (45)      | E2F/DP (14)             | EIL (7)           |          |            |
| ERF (163) | FAR1 (32)     | GATA (40)     | GRAS (63)               | GRF (23)          |          |            |
| GeBP (5)  | HB (142)      | HSF (35)      | LBD (53)                | LFY (1)           |          |            |
| LSD (7)   | M-type (50)   | MIKC (42)     | MYB (145)               | MYB_related (157) |          |            |
| NAC (106) | NF-X1 (2)     | NF-Y (60)     | Nin-like (15)           | NOZZLE (2)        |          |            |
| RAV (3)   | S1Fa-like (3) | SAP (57)      | SBP (29)                | SRS (13)          |          |            |
| STAT (3)  | TCP (31)      | Trihelix (47) | WRKY (102)              | Whirly (4)        |          |            |
| YABBY (9) | ZF-HD (19)    | bHLH (191)    | bZIP (102)              |                   |          |            |

# BROWSE BY FAMILY (CONT.)

## FAMILY DESCRIPTION

Description

List of TFs

Phylogenetic Tree

Heatmap

[Click here to Go Back](#)

Family: AP2

### Family Description:

The AP2/ERF superfamily is defined by the AP2/ERF domain, which consists of about 60 to 70 amino acids and is involved in DNA binding. These three families have been defined as follows. The AP2 family proteins contain two repeated AP2/ERF domains, the ERF family proteins contain a single AP2/ERF domain, and the RAV family proteins contain a B3 domain, which is a DNA-binding domain conserved in other plant-specific transcription factors, in addition to the single AP2/ERF domain. It has been demonstrated that the AP2/ERF proteins have important functions in the transcriptional regulation of a variety of biological processes related to growth and development, as well as various responses to environmental stimuli. Genes in the AP2 family have been shown to participate in the regulation of developmental processes, e.g. flower development, spikelet meristem determinacy, leaf epidermal cell identity, and embryo development. Using an in vitro selection procedure, the DNA binding specificity of the two AP2 repeat containing protein ANT was found to be 5'-gCAC(A/G)N(A/T)TcCC(a/g)ANG(c/t)-3'. This consensus site is much longer than sites recognized by proteins containing a single AP2 repeat and neither AP2 repeat of ANT was alone capable of binding to the selected sequences, suggesting that both AP2 repeats make DNA contacts.

Reference: [16407444](#)

# BROWSE BY FAMILY (CONT.)

[Description](#) [List of TFs](#) [Phylogenetic Tree](#) [Heatmap](#) [Click here to Go Back](#)

## 25 Transcription Factors are present in AP2

Phvul.001G031200.1 Phvul.001G174400.1 Phvul.002G009100.1 Phvul.002G009100.2 Phvul.002G016900.1 Phvul.002G146400.1  
Phvul.003G069000.1 Phvul.003G069000.2 Phvul.003G144500.1 Phvul.003G153100.1 Phvul.003G232600.1 Phvul.003G241900.1  
Phvul.003G288500.1 Phvul.005G138300.1 Phvul.005G183700.1 Phvul.008G043500.1 Phvul.008G052000.1 Phvul.008G185400.1  
Phvul.008G253600.1 Phvul.009G074300.1 Phvul.009G206500.1 Phvul.010G130200.1 Phvul.011G187400.1 Phvul.011G058000.1  
Phvul.011G071100.1

[Description](#) [List of TFs](#) [Phylogenetic Tree](#) [Heatmap](#) [Click here to Go Back](#)

The phylogenetic Tree was created using MEGA software

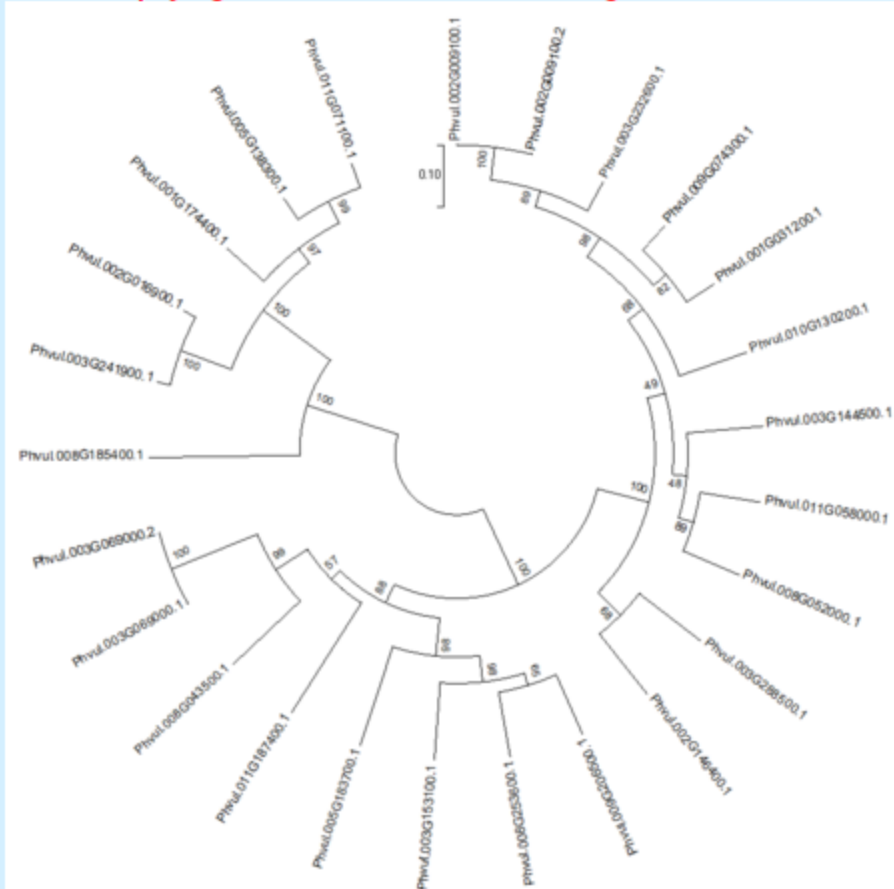

[Description](#) [List of TFs](#) [Phylogenetic Tree](#) [Heatmap](#) [Click here to Go Back](#)

Tissue Specific Expression of Entire TF Family using normalized RPKM values.

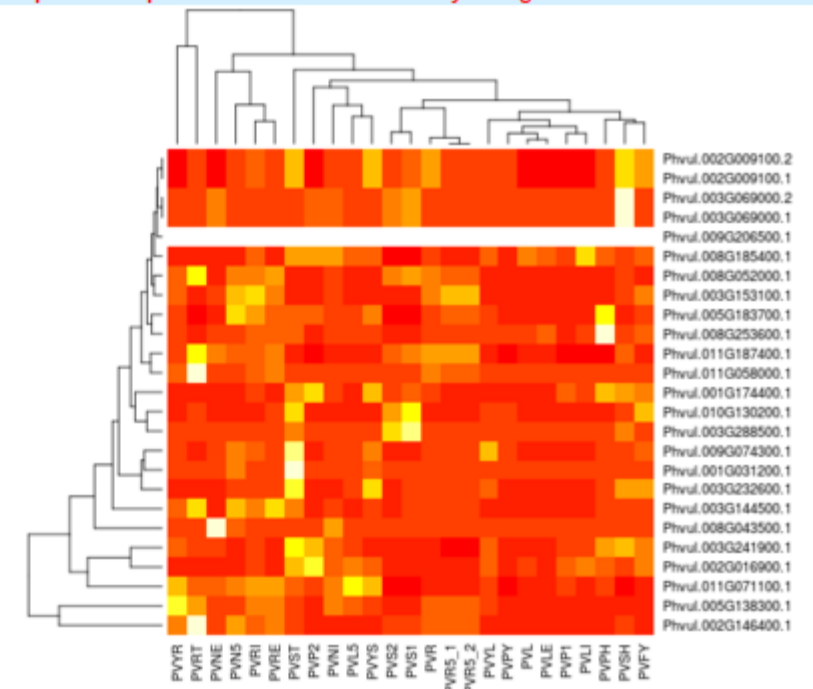

For complete details about this heatmap of expression data, please go through [The Common Bean Gene](#)

# BROWSE BY CHROMOSOME

Home Search Browse References Tutorial Download Contact Us

by Family  
by Chromosome

**Browse by Chromosome**

**Browse by Chromosome**

Pv01 Pv02 Pv03 Pv04 Pv05 Pv06 Pv07 Pv08 Pv09 Pv10 Pv11

Summary

**332 Transcription Factors are present in Chr01**

| TF ID              | Chromosome | Start    | End      | Orientation | Family |
|--------------------|------------|----------|----------|-------------|--------|
| Phvul.001G031200.1 | Chr01      | 2907733  | 2912245  | +           | AP2    |
| Phvul.001G174400.1 | Chr01      | 43723288 | 43726156 | +           | AP2    |
| Phvul.001G008200.1 | Chr01      | 704238   | 709592   | +           | ARF    |
| Phvul.001G202000.1 | Chr01      | 46731492 | 46738571 | -           | ARF    |
| Phvul.001G258000.1 | Chr01      | 51391199 | 51395335 | +           | ARR-B  |
| Phvul.001G258000.2 | Chr01      | 51391889 | 51395335 | +           | ARR-B  |
| Phvul.001G043800.1 | Chr01      | 4529713  | 4537672  | -           | ARR-B  |
| Phvul.001G046300.1 | Chr01      | 4969782  | 4984285  | -           | ARR-B  |
| Phvul.001G125800.1 | Chr01      | 35340847 | 35342926 | -           | ARR-B  |
| Phvul.001G166700.1 | Chr01      | 42826352 | 42827545 | -           | ARR-B  |
| Phvul.001G166800.1 | Chr01      | 42829256 | 42829852 | -           | ARR-B  |
| Phvul.001G168500.1 | Chr01      | 43093331 | 43094123 | +           | ARR-B  |
| Phvul.001G018500.3 | Chr01      | 1587679  | 1591663  | -           | B3     |
| Phvul.001G018500.3 | Chr01      | 1587679  | 1591663  | -           | B3     |
| Phvul.001G018500.3 | Chr01      | 1587679  | 1591663  | -           | B3     |
| Phvul.001G018500.3 | Chr01      | 1587679  | 1591663  | -           | B3     |
| Phvul.001G018500.4 | Chr01      | 1587679  | 1591663  | -           | B3     |
| Phvul.001G018500.4 | Chr01      | 1587679  | 1591663  | -           | B3     |
| Phvul.001G018500.4 | Chr01      | 1587679  | 1591663  | -           | B3     |
| Phvul.001G018500.4 | Chr01      | 1587679  | 1591663  | -           | B3     |
| Phvul.001G018500.4 | Chr01      | 1587679  | 1591663  | -           | B3     |
| Phvul.001G088800.1 | Chr01      | 15530486 | 15533635 | -           | B3     |
| Phvul.001G193100.1 | Chr01      | 45885545 | 45887392 | -           | B3     |
| Phvul.001G018400.1 | Chr01      | 1578240  | 1581243  | -           | B3     |
| Phvul.001G018500.1 | Chr01      | 1587679  | 1591663  | -           | B3     |
| Phvul.001G018500.1 | Chr01      | 1587679  | 1591663  | -           | B3     |
| Phvul.001G018500.1 | Chr01      | 1587679  | 1591663  | -           | B3     |



# REFERENCES

[Home](#)[Search](#)[Browse](#)[References](#)[Tutorial](#)[Download](#)[Contact Us](#)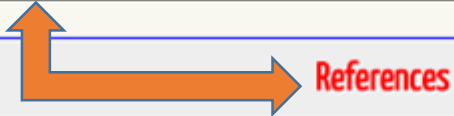

## References

Jeremy S, et al. A reference genome for common bean and genome-wide analysis of dual domestications. *Nature Genetics* 46, 707-713 (2014)

O'Rourke JA, et al. An RNA-Seq based gene expression atlas of the common bean. *BMC Genomics*, 2014;15(1):866

Ambawat S, et al. MYB transcription factor genes as regulators for plant responses: an overview. *Physiol Mol Biol Plants*, 19(3), 307-21 (2013)

Swaminathan K, et al. The plant B3 superfamily. *Trends Plant Sci.*, 13(12):647-55 (2008)

Griffiths S, et al. The evolution of CONSTANS-like gene families in barley, rice, and Arabidopsis. *Plant Physiol.*, 131(4), 1855-67 (2003)

Behringer C, et al. B-GATA transcription factors - insights into their structure, regulation, and role in plant development. *Front Plant Sci.*, 6, 90 (2015)

Ivashkiv LB, et al. Signaling by STATs. *Arthritis Res Ther.*, 6(4), 159-68 (2004)

Finet C, et al. Evolution of the YABBY gene family in seed plants. *Evol Dev.*, (2016)

Philip Jones, et al. InterProScan 5: genome-scale protein function classification. *Bioinformatics*, Jan 2014

Parenicova L, et al. Molecular and phylogenetic analyses of the complete MADS-box transcription factor family in Arabidopsis: new openings to the MADS world. *Plant Cell*, 15(7), 1538-51 (2003)

Muthamilarasan M, et al. C2H2 type of zinc finger transcription factors in foxtail millet define response to abiotic stresses. *Funct Integr Genomics*, 4(3), 531-43 (2014)

Hoe Kim J, et al. Regulation of plant growth and development by the GROWTH-REGULATING FACTOR and GRF-INTERACTING FACTOR duo. *J Exp Bot.*, 66(20), 6093-107 (2015)

Aparicio F, et al. The coat protein of Alfalfa mosaic virus interacts and interferes with the transcriptional activity of the bHLH transcription factor ILR3 promoting salicylic-dependent defense signaling response. *Mol Plant Pathol.*, (2016)

<http://www.php.com>

<http://www.mysql.com>

# DOWNLOAD

---

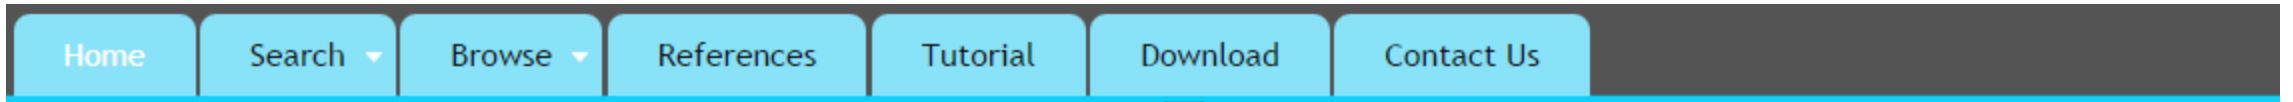

## Download Data

|                 | Protein Sequences        | CDS Sequences            | Transcript Sequences     | 2kb Upstream Sequences   | Genomic Sequences        | SSRs                     |
|-----------------|--------------------------|--------------------------|--------------------------|--------------------------|--------------------------|--------------------------|
| All TF Families | <a href="#">Download</a> | <a href="#">Download</a> | <a href="#">Download</a> | <a href="#">Download</a> | <a href="#">Download</a> | <a href="#">Download</a> |

Please right click on "Download" and select "Save As" option to download the data conveniently.

# CONTACT US

---

[Home](#)

[Search](#) ▾

[Browse](#) ▾

[References](#)

[Tutorial](#)

[Download](#)

[Contact Us](#)

## Contact Us



Dr. MNV Prasad Gajula  
MCA, MS(Sweden), PhD(Germany)  
Research Scientist (Bioinformatics)& DST Ramanujan Fellow  
Institute of Biotechnology,  
PJTSAU, Rajendra Nagar,  
Hyderabad-500030 India  
Phone No: (0091) 96769-52555  
Mail ID: [gajula.ibt@gmail.com](mailto:gajula.ibt@gmail.com), [varaprasad22@yahoo.com](mailto:varaprasad22@yahoo.com)  
[My Profile @ SERB](#)
